# Supplementary material for: Essential Role of the 14q32 Encoded miRNAs in Endocrine Tumors
Source: MDPI journal article supplement (doi:10.3390/genes12050698), 2021-05-08
Supplement: s1 [file s1]

**Supplementary Table 1.** 14q32 miRNAs and their function. Biological Process and Molecular Function were obtained from miRDB database Gene Ontology Module (<http://mirdb.org/mirdb/ontology.html>)

| miRNA gene name | miRNA gene miRBase ID | Chromosomal band | Chromosomal location   | miRNA cluster | mature miRNA name | mature miRNA miRBase ID | GO Biological Process                                                                                                                                                                                                                                                                                                                                                                                                                                                                     | GO Molecular Function                                                                                                                                                                                                                                                                                                                                                                             |
|-----------------|-----------------------|------------------|------------------------|---------------|-------------------|-------------------------|-------------------------------------------------------------------------------------------------------------------------------------------------------------------------------------------------------------------------------------------------------------------------------------------------------------------------------------------------------------------------------------------------------------------------------------------------------------------------------------------|---------------------------------------------------------------------------------------------------------------------------------------------------------------------------------------------------------------------------------------------------------------------------------------------------------------------------------------------------------------------------------------------------|
| hsa-miR-770     | MI0005118             | 14q32.2          | 14:100852409-100852431 | A             | hsa-miR-770-5p    | MIMAT0003948            | chondroitin sulfate proteoglycan biosynthetic process, positive regulation of transcription by RNA polymerase II                                                                                                                                                                                                                                                                                                                                                                          | DNA-binding transcription activator activity, RNA polymerase II-specific, RNA polymerase II cis-regulatory region sequence-specific DNA binding                                                                                                                                                                                                                                                   |
| hsa-miR-493     | MI0003132             | 14q32.2          | 14:100869060-100869148 | A             | hsa-miR-493-5p    | MIMAT0002813            | inhibitory synapse assembly, synaptic transmission, GABAergic, endoplasmic reticulum tubular network organization, cell differentiation in hindbrain, presynapse assembly, forebrain neuron development, cerebellar cortex formation, regulation of ryanodine-sensitive calcium-release channel activity, Wnt signaling pathway, calcium modulating pathway, microtubule polymerization, adherens junction organization, homophilic cell adhesion via plasma membrane adhesion molecules, | LBD domain binding, benzodiazepine receptor activity, GABA-gated chloride ion channel activity, inhibitory extracellular ligand-gated ion channel activity, GABA-A receptor activity, beta-catenin binding, SMAD binding, PDZ domain binding, guanyl-nucleotide exchange factor activity, RNA polymerase II-specific DNA-binding transcription factor binding, transcription coactivator activity |
|                 |                       |                  |                        |               | hsa-miR-493-3p    | MIMAT0003161            | nervous system development, cell differentiation, cell death in response to oxidative stress,                                                                                                                                                                                                                                                                                                                                                                                             |                                                                                                                                                                                                                                                                                                                                                                                                   |
| hsa-miR-337     | MI0000806             | 14q32.2          | 14:100874493-100874585 | A             | hsa-miR-337-5p    | MIMAT0004695            | histone mRNA catabolic process, pathway-restricted SMAD protein phosphorylation, positive regulation of nitric-oxide synthase activity, cellular response to nerve growth factor stimulus, positive regulation of receptor-mediated endocytosis, peptidyl-threonine phosphorylation, protein acylation, positive regulation of protein kinase B signaling, positive regulation of peptidyl-tyrosine phosphorylation,                                                                      | activin-activated receptor activity, SMAD binding, protein homodimerization activity, RNA polymerase II cis-regulatory region sequence-specific DNA binding, DNA-binding transcription factor activity, RNA polymerase II-specific, metal ion binding,                                                                                                                                            |
| hsa-miR-665     | MI0005563             | 14q32.2          | 14:100875033-100875104 | A             | hsa-miR-665       | MIMAT0004952            | positive regulation of catabolic process, regulation of plasma membrane bounded cell projection organization, cell morphogenesis involved in differentiation, animal organ morphogenesis, nervous system development, regulation of developmental process, regulation of localization, regulation of signaling, regulation of cell communication, negative regulation of cellular process, regulation of biological quality, localization, positive regulation of cellular process        | protein binding                                                                                                                                                                                                                                                                                                                                                                                   |
| hsa-miR-431     | MI0001721             | 14q32.2          | 14:100881007-100881120 | A             | hsa-miR-431-5p    | MIMAT0001625            | -                                                                                                                                                                                                                                                                                                                                                                                                                                                                                         | protein binding                                                                                                                                                                                                                                                                                                                                                                                   |
| hsa-miR-433     | MI0001723             | 14q32.2          | 14:100881886-100881978 | A             | hsa-miR-433-5p    | MIMAT0026554            | -                                                                                                                                                                                                                                                                                                                                                                                                                                                                                         | -                                                                                                                                                                                                                                                                                                                                                                                                 |
|                 |                       |                  |                        |               | hsa-miR-433-3p    | MIMAT0001627            | sphingolipid biosynthetic process, regulation of organelle organization, regulation of transcription by RNA polymerase II, regulation of localization, positive regulation of nitrogen compound metabolic process, positive regulation of cellular process,                                                                                                                                                                                                                               | transcription coregulator binding, RNA polymerase II cis-regulatory region sequence-specific DNA binding, DNA-binding transcription factor activity, RNA polymerase II-specific                                                                                                                                                                                                                   |
| hsa-miR-127     | MI0000472             | 14q32.2          | 14:100882979-100883075 | A             | hsa-miR-127-5p    | MIMAT0004604            | homophilic cell adhesion via plasma membrane adhesion molecules, nervous system development                                                                                                                                                                                                                                                                                                                                                                                               | -                                                                                                                                                                                                                                                                                                                                                                                                 |
|                 |                       |                  |                        |               | hsa-miR-127-3p    | MIMAT0000446            | -                                                                                                                                                                                                                                                                                                                                                                                                                                                                                         | ion transmembrane transporter activity, phosphorylative mechanism                                                                                                                                                                                                                                                                                                                                 |
| hsa-miR-432     | MI0003133             | 14q32.2          | 14:100884483-100884576 | A             | hsa-miR-432-5p    | MIMAT0002814            | negative regulation of signal transduction, positive regulation of transcription by RNA polymerase II, regulation of cellular protein metabolic process, regulation of biological quality, system development                                                                                                                                                                                                                                                                             | protein binding                                                                                                                                                                                                                                                                                                                                                                                   |
|                 |                       |                  |                        |               | hsa-miR-432-3p    | MIMAT0002815            | positive regulation of cell projection organization, regulation of dendrite development, neuron projection morphogenesis, cell junction organization, inorganic cation transmembrane transport, cell migration, negative regulation of signaling, negative regulation of cell communication, negative regulation of response to stimulus, regulation of biological quality                                                                                                                | nitric-oxide synthase regulator activity, metal ion transmembrane transporter activity                                                                                                                                                                                                                                                                                                            |
| hsa-miR-136     | MI0000475             | 14q32.2          | 14:100884702-100884783 | A             | hsa-miR-136-5p    | MIMAT0000448            | positive regulation of macromolecule biosynthetic process, regulation of transcription by RNA polymerase II, negative regulation of macromolecule metabolic process, negative regulation of cellular metabolic process, positive regulation of nitrogen compound metabolic process, regulation of signal transduction, cellular macromolecule metabolic process                                                                                                                           | nucleic acid binding                                                                                                                                                                                                                                                                                                                                                                              |
| hsa-miR-370     | MI0000778             | 14q32.31         | 14:100911139-100911213 | A             | hsa-miR-370-5p    | MIMAT0026483            | positive regulation of high voltage-gated calcium channel activity, animal organ morphogenesis, nervous system development                                                                                                                                                                                                                                                                                                                                                                | protein binding                                                                                                                                                                                                                                                                                                                                                                                   |
|                 |                       |                  |                        |               | hsa-miR-370-3p    | MIMAT0000722            | protein phosphorylation, brain development, cell development, anatomical structure morphogenesis, negative regulation of cellular process, detection of chemical stimulus involved in sensory perception of smell                                                                                                                                                                                                                                                                         | protein tyrosine kinase activity, protein binding                                                                                                                                                                                                                                                                                                                                                 |
| hsa-miR-379     | MI0000787             | 14q32.31         | 14:101022066-101022132 | B             | hsa-miR-379-5p    | MIMAT0000733            | -                                                                                                                                                                                                                                                                                                                                                                                                                                                                                         | -                                                                                                                                                                                                                                                                                                                                                                                                 |
|                 |                       |                  |                        |               | hsa-miR-379-3p    | MIMAT0004690            | Wnt signaling pathway, calcium modulating pathway, synapse organization, regulation of synapse organization, modulation of chemical synaptic transmission, positive regulation of cellular component biogenesishead development, regulation of organelle organization, positive regulation of cellular component organization, regulation of multicellular organismal development, positive regulation of RNA metabolic process                                                           | protein binding                                                                                                                                                                                                                                                                                                                                                                                   |
| hsa-miR-411     | MI0003675             | 14q32.31         | 14:101023325-101023420 | B             | hsa-miR-411-5p    | MIMAT0003329            | -                                                                                                                                                                                                                                                                                                                                                                                                                                                                                         | -                                                                                                                                                                                                                                                                                                                                                                                                 |

|               |           |          |                        |   |                 |              |                                                                                                                                                                                                                                                                                                                                                                                                                                                                                                                                                                                                                                                                                                                                                         |                                                                                                                                                                                                                                                                             |
|---------------|-----------|----------|------------------------|---|-----------------|--------------|---------------------------------------------------------------------------------------------------------------------------------------------------------------------------------------------------------------------------------------------------------------------------------------------------------------------------------------------------------------------------------------------------------------------------------------------------------------------------------------------------------------------------------------------------------------------------------------------------------------------------------------------------------------------------------------------------------------------------------------------------------|-----------------------------------------------------------------------------------------------------------------------------------------------------------------------------------------------------------------------------------------------------------------------------|
| hsa-miR-299   | MI0000744 | 14q32.31 | 14:101023794-101023856 | B | hsa-miR-299-5p  | MIMAT0002890 | cardiac atrium development, ventricular septum development, aorta development, positive regulation of neuron apoptotic process, artery morphogenesis, cell morphogenesis involved in neuron differentiation, axon development, neuron projection morphogenesis                                                                                                                                                                                                                                                                                                                                                                                                                                                                                          | protein binding                                                                                                                                                                                                                                                             |
|               |           |          |                        |   | hsa-miR-299-3p  | MIMAT0000687 | -                                                                                                                                                                                                                                                                                                                                                                                                                                                                                                                                                                                                                                                                                                                                                       | protein binding                                                                                                                                                                                                                                                             |
| hsa-miR-380   | MI0000788 | 14q32.31 | 14:101025017-101025077 | B | hsa-miR-380-5p  | MIMAT0000734 | -                                                                                                                                                                                                                                                                                                                                                                                                                                                                                                                                                                                                                                                                                                                                                       | -                                                                                                                                                                                                                                                                           |
|               |           |          |                        |   | hsa-miR-380-3p  | MIMAT0000735 | regulation of developmental process, detection of chemical stimulus involved in sensory perception of smell                                                                                                                                                                                                                                                                                                                                                                                                                                                                                                                                                                                                                                             | protein binding                                                                                                                                                                                                                                                             |
| hsa-miR-1197  | MI0006656 | 14q32.31 | 14:101025564-101025651 | B | hsa-miR-1197    | MIMAT0005955 | Wnt signaling pathway, calcium modulating pathway, glycosaminoglycan biosynthetic process, intracellular receptor signaling pathway, negative regulation of protein phosphorylation, synaptic signaling, negative regulation of cell differentiation, neuron development                                                                                                                                                                                                                                                                                                                                                                                                                                                                                | enzyme binding, ion binding                                                                                                                                                                                                                                                 |
| hsa-miR-323a  | MI0000807 | 14q32.31 | 14:101025732-101025817 | B | hsa-miR-323a-5p | MIMAT0004696 | positive regulation of peptidyl-serine phosphorylation of STAT protein, natural killer cell activation involved in immune response, animal organ development, regulation of transcription, DNA-templated                                                                                                                                                                                                                                                                                                                                                                                                                                                                                                                                                | -                                                                                                                                                                                                                                                                           |
|               |           |          |                        |   | hsa-miR-323a-3p | MIMAT0000755 | neuron projection extension, peptidyl-threonine phosphorylation, negative regulation of epithelial cell proliferation, cytokinesis, Golgi organization, stress-activated protein kinase signaling cascade, peptidyl-serine phosphorylation, locomotor behavior, response to transforming growth factor beta, regulation of mRNA metabolic process, negative regulation of intracellular signal transduction, response to peptide hormone, mRNA processing, regulation of neuron projection development, posttranscriptional regulation of gene expression, positive regulation of protein kinase activity, cell morphogenesis involved in differentiation, negative regulation of cell cycle                                                            | protein threonine kinase activity, protein serine kinase activity, magnesium ion binding, phosphatidylinositol binding, mRNA binding, ATP binding, protein binding                                                                                                          |
| hsa-miR-758   | MI0003757 | 14q32.31 | 14:101026020-101026107 | B | hsa-miR-758-5p  | MIMAT0022929 | -                                                                                                                                                                                                                                                                                                                                                                                                                                                                                                                                                                                                                                                                                                                                                       | -                                                                                                                                                                                                                                                                           |
|               |           |          |                        |   | hsa-miR-758-3p  | MIMAT0003879 | gonadal mesoderm development, circulatory system development, regulation of transcription by RNA polymerase II, positive regulation of cellular metabolic process, positive regulation of nitrogen compound metabolic process                                                                                                                                                                                                                                                                                                                                                                                                                                                                                                                           | sodium ion transmembrane transporter activity, transcription regulator activity, metal ion binding                                                                                                                                                                          |
| hsa-miR-329-1 | MI0001725 | 14q32.31 | 14:101026785-101026864 | B | hsa-miR-329-5p  | MIMAT0026555 | negative regulation of cellular process, innate immune response, detection of chemical stimulus involved in sensory perception of smell                                                                                                                                                                                                                                                                                                                                                                                                                                                                                                                                                                                                                 | metal ion binding, G protein-coupled receptor activity, olfactory receptor activity                                                                                                                                                                                         |
| hsa-miR-329-2 | MI0001726 | 14q32.31 | 14:101027100-101027183 | B | hsa-miR-329-3p  | MIMAT0001629 | dendrite morphogenesis, neuron projection extension, negative regulation of BMP signaling pathway, homophilic cell adhesion via plasma membrane adhesion molecules, peptidyl-serine phosphorylation, regulation of protein stability, regulation of cellular protein catabolic process, histone modification, axon development, positive regulation of cellular catabolic process, regulation of cell migration, regulation of growth, positive regulation of transcription by RNA polymerase II, central nervous system development, regulation of cell differentiation, positive regulation of cellular protein metabolic process                                                                                                                     | poly-purine tract binding, calcium ion binding, catalytic activity, acting on a protein, protein binding                                                                                                                                                                    |
| hsa-miR-494   | MI0003134 | 14q32.31 | 14:101029634-101029714 | B | hsa-miR-494-5p  | MIMAT0026607 | peptidyl-amino acid modification                                                                                                                                                                                                                                                                                                                                                                                                                                                                                                                                                                                                                                                                                                                        | -                                                                                                                                                                                                                                                                           |
|               |           |          |                        |   | hsa-miR-494-3p  | MIMAT0002816 | central nervous system neuron axonogenesis, circadian regulation of gene expression, regulation of dendritic spine development, negative regulation of cellular response to growth factor stimulus, limb development, histone modification, chromatin remodeling, developmental growth, regulation of neuron projection development, regulation of vesicle-mediated transport, positive regulation of organelle organization, brain development, positive regulation of transcription by RNA polymerase II, protein modification by small protein conjugation or removal, regulation of protein localization, negative regulation of transcription, DNA-templated, embryo development, positive regulation of cell differentiation, cell-cell signaling | enzyme binding, catalytic activity, acting on a protein, DNA binding, metal ion binding                                                                                                                                                                                     |
| hsa-miR-1193  | MI0014205 | 14q32.31 | 14:101030052-101030129 | B | hsa-miR-1193    | MIMAT0015049 | -                                                                                                                                                                                                                                                                                                                                                                                                                                                                                                                                                                                                                                                                                                                                                       | -                                                                                                                                                                                                                                                                           |
| hsa-miR-543   | MI0005565 | 14q32.31 | 14:101031987-101032064 | B | hsa-miR-543     | MIMAT0004954 | cellular response to leukemia inhibitory factor, regulation of mRNA splicing, via spliceosome, homophilic cell adhesion via plasma membrane adhesion molecules, protein dephosphorylation, rhythmic process, proteasome-mediated ubiquitin-dependent protein catabolic process, blood vessel morphogenesis, cell morphogenesis involved in differentiation, regulation of neuron projection development, positive regulation of transcription by RNA polymerase II, negative regulation of transcription by RNA polymerase II, protein modification by small protein conjugation, positive regulation of cellular component organization, regulation of cellular catabolic process                                                                      | ubiquitin conjugating enzyme binding, ubiquitin-like protein transferase activity, protein domain specific binding, metal ion binding, organic cyclic compound binding, heterocyclic compound binding                                                                       |
| hsa-miR-495   | MI0003135 | 14q32.31 | 14:101033755-101033836 | B | hsa-miR-495-5p  | MIMAT0022924 | positive regulation of dendrite extension, cellular response to alcohol, negative regulation of gene expression, negative regulation of cellular macromolecule biosynthetic process, negative regulation of RNA metabolic process, positive regulation of RNA metabolic process, positive regulation of protein metabolic process, positive regulation of cellular biosynthetic process, positive regulation of macromolecule biosynthetic process, regulation of transcription by RNA polymerase II                                                                                                                                                                                                                                                    | protein binding                                                                                                                                                                                                                                                             |
|               |           |          |                        |   | hsa-miR-495-3p  | MIMAT0002817 | prostate gland growth, interleukin-6-mediated signaling pathway, lung epithelial cell differentiation, hippo signaling, myotube cell development, axis elongation, endocardial cushion development, regulation of dendritic spine development, regulation of filopodium assembly, protein monoubiquitination, regulation of dendritic spine morphogenesis, regulation of heart growth, regulation of dendrite development, regulation of cell-matrix adhesion, regulation of circadian rhythm, Notch signaling pathway                                                                                                                                                                                                                                  | transcription coactivator binding, ubiquitin conjugating enzyme binding, nuclear receptor activity, histone acetyltransferase activity, beta-catenin binding, histone deacetylase binding, SMAD binding, phosphoprotein phosphatase activity, histone binding, mRNA binding |

|                |           |          |                        |   |                   |              |                                                                                                                                                                                                                                                                                                                                                                                                                                                                                                                                                                                                                                                                                                                                                                                                                                                                                                                                |                                                                                                                                                                                                                                                                                                                                                                                                                                                                                                         |
|----------------|-----------|----------|------------------------|---|-------------------|--------------|--------------------------------------------------------------------------------------------------------------------------------------------------------------------------------------------------------------------------------------------------------------------------------------------------------------------------------------------------------------------------------------------------------------------------------------------------------------------------------------------------------------------------------------------------------------------------------------------------------------------------------------------------------------------------------------------------------------------------------------------------------------------------------------------------------------------------------------------------------------------------------------------------------------------------------|---------------------------------------------------------------------------------------------------------------------------------------------------------------------------------------------------------------------------------------------------------------------------------------------------------------------------------------------------------------------------------------------------------------------------------------------------------------------------------------------------------|
| hsa-miR-376c   | MI0000776 | 14q32.31 | 14:101039690-101039755 | B | hsa-miR-376c-5p   | MIMAT0022861 | -                                                                                                                                                                                                                                                                                                                                                                                                                                                                                                                                                                                                                                                                                                                                                                                                                                                                                                                              | lipid binding, protein binding                                                                                                                                                                                                                                                                                                                                                                                                                                                                          |
|                |           |          |                        |   | hsa-miR-376c-3p   | MIMAT0000720 | synapse organization, axon guidance                                                                                                                                                                                                                                                                                                                                                                                                                                                                                                                                                                                                                                                                                                                                                                                                                                                                                            | -                                                                                                                                                                                                                                                                                                                                                                                                                                                                                                       |
| hsa-miR-376a-2 | MI0003529 | 14q32.31 | 14:101040069-101040148 | B | hsa-miR-376a-2-5p | MIMAT0022928 | -                                                                                                                                                                                                                                                                                                                                                                                                                                                                                                                                                                                                                                                                                                                                                                                                                                                                                                                              | -                                                                                                                                                                                                                                                                                                                                                                                                                                                                                                       |
| hsa-miR-654    | MI0003676 | 14q32.31 | 14:101040219-101040299 | B | hsa-miR-654-5p    | MIMAT0003330 | SMAD protein signal transduction, cognition, skeletal system development, regulation of secretion by cell, regulation of protein localization, positive regulation of transcription by RNA polymerase II nervous system development, regulation of multicellular organismal process, regulation of signal transduction, detection of chemical stimulus involved in sensory perception of smell,                                                                                                                                                                                                                                                                                                                                                                                                                                                                                                                                | growth hormone receptor binding, enzyme binding                                                                                                                                                                                                                                                                                                                                                                                                                                                         |
|                |           |          |                        |   | hsa-miR-654-3p    | MIMAT0004814 | positive regulation of transcription by RNA polymerase II, cell development, sensory perception of chemical stimulus                                                                                                                                                                                                                                                                                                                                                                                                                                                                                                                                                                                                                                                                                                                                                                                                           | DNA-binding transcription activator activity, RNA polymerase II-specific, RNA polymerase II cis-regulatory region sequence-specific DNA binding, metal ion binding, protein binding                                                                                                                                                                                                                                                                                                                     |
| hsa-miR-376b   | MI0002466 | 14q32.31 | 14:101040436-101040535 | B | hsa-miR-376b-5p   | MIMAT0022923 | -                                                                                                                                                                                                                                                                                                                                                                                                                                                                                                                                                                                                                                                                                                                                                                                                                                                                                                                              | protein binding                                                                                                                                                                                                                                                                                                                                                                                                                                                                                         |
|                |           |          |                        |   | hsa-miR-376b-3p   | MIMAT0002172 | nervous system development, regulation of primary metabolic process                                                                                                                                                                                                                                                                                                                                                                                                                                                                                                                                                                                                                                                                                                                                                                                                                                                            | ion binding, protein binding                                                                                                                                                                                                                                                                                                                                                                                                                                                                            |
| hsa-miR-376a-1 | MI0000784 | 14q32.31 | 14:101040782-101040849 | B | hsa-miR-376a-5p   | MIMAT0003386 | -                                                                                                                                                                                                                                                                                                                                                                                                                                                                                                                                                                                                                                                                                                                                                                                                                                                                                                                              | protein binding                                                                                                                                                                                                                                                                                                                                                                                                                                                                                         |
|                |           |          |                        |   | hsa-miR-376a-3p   | MIMAT0000729 | nervous system development, regulation of primary metabolic process                                                                                                                                                                                                                                                                                                                                                                                                                                                                                                                                                                                                                                                                                                                                                                                                                                                            | ion binding, protein binding                                                                                                                                                                                                                                                                                                                                                                                                                                                                            |
| hsa-miR-300    | MI0005525 | 14q32.31 | 14:101041363-101041445 | B | hsa-miR-300       | MIMAT0004903 | monoubiquitinated protein deubiquitination, suckling behavior, branch elongation of an epithelium, epithelial cell fate commitment, neuroblast proliferation, cell surface receptor signaling pathway involved in heart development, central nervous system projection neuron axonogenesis, peptidyl-lysine trimethylation, mRNA destabilization, positive regulation of histone methylation, blood vessel remodeling, microtubule polymerization, circadian regulation of gene expression, canonical Wnt signaling pathway                                                                                                                                                                                                                                                                                                                                                                                                    | E-box binding, beta-catenin binding, mRNA binding, histone binding, RNA polymerase II-specific DNA-binding transcription factor binding, DNA-binding transcription activator activity, RNA polymerase II-specific, transcription coregulator activity, protein kinase binding                                                                                                                                                                                                                           |
| hsa-miR-1185-1 | MI0003844 | 14q32.31 | 14:101042977-101043062 | B | hsa-miR-1185-1-5p | MIMAT0005798 | cGMP catabolic process, negative regulation of cell proliferation involved in kidney development, trans-synaptic signaling by endocannabinoid, cell-cell adhesion mediated by integrin, endothelial cell fate commitment, trans-synaptic signaling, modulating synaptic transmission, trachea morphogenesis, negative regulation of cAMP-mediated signaling, ganglion development, mammary gland epithelial cell differentiation, pharyngeal system development, beta-catenin-TCF complex assembly, salivary gland morphogenesis, positive regulation of cardiac muscle cell proliferation, epithelial tube branching involved in lung morphogenesis, cardiac epithelial to mesenchymal transition, positive regulation of mesenchymal cell proliferation                                                                                                                                                                      | mRNA 3'-UTR binding, transmembrane receptor protein tyrosine kinase activitySMAD binding, beta-catenin binding, activating transcription factor binding, transcription corepressor activity, histone deacetylase binding, protein phosphatase binding, GTPase regulator activity, chromatin binding, protein serine/threonine kinase activity, RNA polymerase II cis-regulatory region sequence-specific DNA binding, identical protein binding, metal ion binding, G protein-coupled receptor activity |
| hsa-miR-1185-2 | MI0003821 | 14q32.31 | 14:101044198-101044283 | B | hsa-miR-1185-5p   | MIMAT0005798 | cGMP catabolic process, negative regulation of cell proliferation involved in kidney development, trans-synaptic signaling by endocannabinoid, cell-cell adhesion mediated by integrin, endothelial cell fate commitment, trans-synaptic signaling, modulating synaptic transmission, trachea morphogenesis, negative regulation of cAMP-mediated signaling, ganglion development, mammary gland epithelial cell differentiation, pharyngeal system development, beta-catenin-TCF complex assembly, salivary gland morphogenesis, positive regulation of cardiac muscle cell proliferation, epithelial tube branching involved in lung morphogenesis, cardiac epithelial to mesenchymal transition, positive regulation of mesenchymal cell proliferation, glutamate secretion, face morphogenesis, Golgi to plasma membrane protein transport, cAMP-mediated signaling, cellular response to amyloid-beta, mRNA stabilization | mRNA 3'-UTR binding, transmembrane receptor protein tyrosine kinase activitySMAD binding, beta-catenin binding, activating transcription factor binding, transcription corepressor activity, histone deacetylase binding, protein phosphatase binding, GTPase regulator activity, chromatin binding, protein serine/threonine kinase activity, RNA polymerase II cis-regulatory region sequence-specific DNA binding, identical protein binding, metal ion binding, G protein-coupled receptor activity |
|                |           |          |                        |   | hsa-miR-1185-3p   | MIMAT0022713 | cGMP catabolic process, negative regulation of cell proliferation involved in kidney development, trans-synaptic signaling by endocannabinoid, cell-cell adhesion mediated by integrin, endothelial cell fate commitment, trans-synaptic signaling, modulating                                                                                                                                                                                                                                                                                                                                                                                                                                                                                                                                                                                                                                                                 | mRNA 3'-UTR binding, transmembrane receptor protein tyrosine kinase activitySMAD binding, beta-catenin binding, activating transcription factor binding, transcription corepressor activity, histone deacetylase binding, protein phosphatase binding, GTPase regulator activity, chromatin binding, protein serine/threonine kinase activity, RNA polymerase II cis-regulatory region sequence-specific DNA binding, identical protein binding, metal ion binding, G protein-coupled receptor activity |
| hsa-miR-381    | MI0000789 | 14q32.31 | 14:101045920-101045994 | B | hsa-miR-381-5p    | MIMAT0022862 | -                                                                                                                                                                                                                                                                                                                                                                                                                                                                                                                                                                                                                                                                                                                                                                                                                                                                                                                              | -                                                                                                                                                                                                                                                                                                                                                                                                                                                                                                       |
|                |           |          |                        |   | hsa-miR-381-3p    | MIMAT0000736 | regulation of lymphoid progenitor cell differentiation, monoubiquitinated protein deubiquitination, pericardium morphogenesis, suckling behavior, branch elongation of an epithelium, epithelial cell fate commitment, neuroblast proliferation, cell surface receptor signaling pathway involved in heart development, regulation of RIG-I signaling pathway, central nervous system projection neuron axonogenesis, peptidyl-lysine trimethylation, mRNA destabilization, positive regulation of histone methylation, blood vessel remodeling, circadian regulation of gene expression, negative regulation of epithelial cell differentiation, cardiac ventricle morphogenesis, canonical Wnt signaling pathway                                                                                                                                                                                                             | E-box binding, mRNA binding, histone bindingDNA-binding transcription activator activity, RNA polymerase II-specific, protein domain specific binding, protein-containing complex binding, catalytic activity, acting on a protein, metal ion binding                                                                                                                                                                                                                                                   |
| hsa-miR-487b   | MI0003530 | 14q32.31 | 14:101046455-101046538 | B | hsa-miR-487b-5p   | MIMAT0026614 | neuromuscular junction development, hormone-mediated signaling pathway, cellular response to steroid hormone stimulus, actin cytoskeleton organization, negative regulation of developmental process, regulation of cell differentiation, anatomical structure morphogenesis                                                                                                                                                                                                                                                                                                                                                                                                                                                                                                                                                                                                                                                   | RNA polymerase II transcription coactivator binding, nuclear receptor activity, enzyme binding                                                                                                                                                                                                                                                                                                                                                                                                          |
|                |           |          |                        |   | hsa-miR-487b-3p   | MIMAT0003180 | -                                                                                                                                                                                                                                                                                                                                                                                                                                                                                                                                                                                                                                                                                                                                                                                                                                                                                                                              | -                                                                                                                                                                                                                                                                                                                                                                                                                                                                                                       |
| hsa-miR-539    | MI0003514 | 14q32.31 | 14:101047321-101047398 | B | hsa-miR-539-5p    | MIMAT0003163 | dendrite morphogenesis, neural retina development, hippocampus development, peptidyl-serine phosphorylation, Wnt signaling pathway, vesicle organization, regulation of ion transport, regulation of ion transport                                                                                                                                                                                                                                                                                                                                                                                                                                                                                                                                                                                                                                                                                                             | histone deacetylase binding, protein kinase binding, cytoskeletal protein binding, RNA polymerase II cis-regulatory region sequence-specific DNA binding, transcription regulator activity,metal ion binding                                                                                                                                                                                                                                                                                            |

|              |           |          |                        |   |                 |              |                                                                                                                                                                                                                                                                                                                                                                                                                                                                                                                                           |                                                                                                                                                                                                                                                          |
|--------------|-----------|----------|------------------------|---|-----------------|--------------|-------------------------------------------------------------------------------------------------------------------------------------------------------------------------------------------------------------------------------------------------------------------------------------------------------------------------------------------------------------------------------------------------------------------------------------------------------------------------------------------------------------------------------------------|----------------------------------------------------------------------------------------------------------------------------------------------------------------------------------------------------------------------------------------------------------|
|              |           |          |                        |   | hsa-miR-539-3p  | MIMAT0022705 | homophilic cell adhesion via plasma membrane adhesion molecules, nucleocytoplasmic transport, cellular protein localization, nervous system development, biological regulation                                                                                                                                                                                                                                                                                                                                                            | ion binding, protein binding                                                                                                                                                                                                                             |
| hsa-miR-889  | MI0005540 | 14q32.31 | 14:101047901-101047979 | B | hsa-miR-889-5p  | MIMAT0026719 | gonadal mesoderm development, regulation of neurotransmitter secretion, homophilic cell adhesion via plasma membrane adhesion molecules, hormone-mediated signaling pathway, regulation of ion transport, nervous system development, adaptive immune response, detection of chemical stimulus involved in sensory perception of smell                                                                                                                                                                                                    | voltage-gated potassium channel activity, phosphatidylinositol bisphosphate binding, histone binding, calcium ion binding, DNA-binding transcription factor activity, RNA polymerase II-specific, sequence-specific double-stranded DNA binding          |
|              |           |          |                        |   | hsa-miR-889-3p  | MIMAT0004921 | negative regulation of cytoplasmic translation, positive regulation of transcription from RNA polymerase II promoter involved in cellular response to chemical stimulus, negative regulation of mRNA catabolic process, regulation of sodium ion transport, epithelial cell proliferation, hormone-mediated signaling pathway, hormone-mediated signaling pathway, regulation of cation channel activity, myeloid cell differentiation, modulation of chemical synaptic transmission, protein phosphopantetheinylation, axon development, | SMAD binding, mRNA 3'-UTR binding, transferase activity                                                                                                                                                                                                  |
| hsa-miR-544a | MI0003515 | 14q32.31 | 14:101048712-101048733 | B | hsa-miR-544a    | MIMAT0003164 | positive regulation of cell-substrate junction organization, regulation of dendritic spine development, regulation of insulin receptor signaling pathway, homophilic cell adhesion via plasma membrane adhesion molecules, myelination, negative regulation of translation, positive regulation of supramolecular fiber organization, protein phosphorylation, positive regulation of organelle organization, neuron projection development                                                                                               | SMAD binding, protein serine/threonine kinase activity, transcription regulator activity, nucleic acid binding, ion binding                                                                                                                              |
| hsa-miR-655  | MI0003677 | 14q32.31 | 14:101049550-101049646 | B | hsa-miR-655-5p  | MIMAT0026626 | regulation of intracellular signal transduction                                                                                                                                                                                                                                                                                                                                                                                                                                                                                           | protein binding                                                                                                                                                                                                                                          |
|              |           |          |                        |   | hsa-miR-655-3p  | MIMAT0003331 | positive regulation of translational initiation, positive regulation of protein autophosphorylation, platelet-derived growth factor receptor signaling pathway, smooth muscle cell differentiation, regulation of protein deacetylation, endocardial cushion development, artery morphogenesis                                                                                                                                                                                                                                            | mRNA 3'-UTR binding, GTPase activator activity, DNA-binding transcription repressor activity, RNA polymerase II-specific, ubiquitin protein ligase activity, DNA-binding transcription activator activity, RNA polymerase II-specific, chromatin binding |
| hsa-miR-487a | MI0002471 | 14q32.31 | 14:101052446-101052525 | B | hsa-miR-487a-5p | MIMAT0026559 | neuromuscular junction development, hormone-mediated signaling pathway, cellular response to steroid hormone stimulus, transcription initiation from RNA polymerase II promoter, actin cytoskeleton organization, negative regulation of developmental process                                                                                                                                                                                                                                                                            | RNA polymerase II transcription coactivator binding, nuclear receptor activity, enzyme binding                                                                                                                                                           |
|              |           |          |                        |   | hsa-miR-487a-3p | MIMAT0002178 | regulation of cellular process                                                                                                                                                                                                                                                                                                                                                                                                                                                                                                            | -                                                                                                                                                                                                                                                        |
| hsa-miR-382  | MI0000790 | 14q32.31 | 14:101054306-101054381 | B | hsa-miR-382-5p  | MIMAT0000737 | nervous system development                                                                                                                                                                                                                                                                                                                                                                                                                                                                                                                | -                                                                                                                                                                                                                                                        |
|              |           |          |                        |   | hsa-miR-382-3p  | MIMAT0022697 | detection of chemical stimulus involved in sensory perception                                                                                                                                                                                                                                                                                                                                                                                                                                                                             | binding                                                                                                                                                                                                                                                  |
| hsa-miR-134  | MI0000474 | 14q32.31 | 14:101054687-101054759 | B | hsa-miR-134-5p  | MIMAT0000447 | -                                                                                                                                                                                                                                                                                                                                                                                                                                                                                                                                         | -                                                                                                                                                                                                                                                        |
|              |           |          |                        |   | hsa-miR-134-3p  | MIMAT0026481 | positive regulation of smoothened signaling pathway, blood vessel development, anatomical structure formation involved in morphogenesis, neurogenesis, cell development, regulation of cellular metabolic process, regulation of macromolecule metabolic process                                                                                                                                                                                                                                                                          | protein binding                                                                                                                                                                                                                                          |
| hsa-miR-668  | MI0003761 | 14q32.31 | 14:101055258-101055323 | B | hsa-miR-668-5p  | MIMAT0026636 | -                                                                                                                                                                                                                                                                                                                                                                                                                                                                                                                                         | -                                                                                                                                                                                                                                                        |
|              |           |          |                        |   | hsa-miR-668-3p  | MIMAT0003881 | regulation of neuron projection development, regulation of anatomical structure morphogenesis, positive regulation of developmental process, regulation of cell differentiation, regulation of intracellular signal transduction, regulation of transcription by RNA polymerase II, cellular protein modification process                                                                                                                                                                                                                 | transferase activity, protein binding                                                                                                                                                                                                                    |
| hsa-miR-485  | MI0002469 | 14q32.31 | 14:101055419-101055491 | B | hsa-miR-485-5p  | MIMAT0002175 | regulation of small GTPase mediated signal transduction, anion transport, regulation of biological quality, negative regulation of cellular process, regulation of primary metabolic process                                                                                                                                                                                                                                                                                                                                              | secondary active transmembrane transporter activity, protein binding                                                                                                                                                                                     |
|              |           |          |                        |   | hsa-miR-485-3p  | MIMAT0002176 | homophilic cell adhesion via plasma membrane adhesion molecules, cellular protein localization, negative regulation of nucleobase-containing compound metabolic process, nervous system development                                                                                                                                                                                                                                                                                                                                       | ion binding, protein binding                                                                                                                                                                                                                             |
| hsa-miR-323b | MI0014206 | 14q32.31 | 14:101056219-101056300 | B | hsa-miR-323b-5p | MIMAT0001630 | dendritic spine morphogenesis,                                                                                                                                                                                                                                                                                                                                                                                                                                                                                                            | frizzled binding, protein tyrosine kinase activity, sodium ion transmembrane transporter activity, voltage-gated ion channel activity, ubiquitin protein ligase binding, protein kinase binding, ATP binding                                             |
|              |           |          |                        |   | hsa-miR-323b-3p | MIMAT0015050 | -                                                                                                                                                                                                                                                                                                                                                                                                                                                                                                                                         | -                                                                                                                                                                                                                                                        |
| hsa-miR-154  | MI0000480 | 14q32.31 | 14:101059755-101059838 | B | hsa-miR-154-5p  | MIMAT0000452 | regulation of intracellular protein transport, chromatin organization, cellular protein modification process, positive regulation of cellular process,                                                                                                                                                                                                                                                                                                                                                                                    | -                                                                                                                                                                                                                                                        |
|              |           |          |                        |   | hsa-miR-154-3p  | MIMAT0000453 | biological regulation                                                                                                                                                                                                                                                                                                                                                                                                                                                                                                                     | -                                                                                                                                                                                                                                                        |
| hsa-miR-496  | MI0003136 | 14q32.31 | 14:101060628-101060649 | B | hsa-miR-496     | MIMAT0002818 | -                                                                                                                                                                                                                                                                                                                                                                                                                                                                                                                                         | metal ion binding                                                                                                                                                                                                                                        |
| hsa-miR-377  | MI0000785 | 14q32.31 | 14:101062050-101062118 | B | hsa-miR-377-5p  | MIMAT0004689 | negative regulation of execution phase of apoptosis, regulation of signaling, regulation of cell communication                                                                                                                                                                                                                                                                                                                                                                                                                            | binding                                                                                                                                                                                                                                                  |
|              |           |          |                        |   | hsa-miR-377-3p  | MIMAT0000730 | regulation of microtubule motor activity, Wnt signaling pathway, calcium modulating pathway, positive regulation of blood vessel endothelial cell migration, histone modification, axonogenesis, positive regulation of cellular catabolic process, blood vessel morphogenesis, modulation of chemical synaptic transmission                                                                                                                                                                                                              | Hsp90 protein binding, mRNA binding, phosphoric ester hydrolase activity, RNA polymerase II cis-regulatory region sequence-specific DNA binding, DNA-binding transcription factor activity, RNA polymerase II-specific, enzyme binding,                  |

|             |           |          |                        |   |                |              |                                                                                                                                                                                                                                                                                                                                                                                                |                                                                                                                                                                                                                                              |
|-------------|-----------|----------|------------------------|---|----------------|--------------|------------------------------------------------------------------------------------------------------------------------------------------------------------------------------------------------------------------------------------------------------------------------------------------------------------------------------------------------------------------------------------------------|----------------------------------------------------------------------------------------------------------------------------------------------------------------------------------------------------------------------------------------------|
| hsa-miR-541 | MI0005539 | 14q32.31 | 14:101064495-101064578 | B | hsa-miR-541-5p | MIMAT0004919 | regulation of nucleobase-containing compound metabolic process, regulation of macromolecule metabolic process, detection of chemical stimulus involved in sensory perception                                                                                                                                                                                                                   | RNA binding, metal ion binding, protein binding                                                                                                                                                                                              |
|             |           |          |                        |   | hsa-miR-541-3p | MIMAT0004920 | SMAD protein signal transduction, cognition, regulation of secretion, positive regulation of transcription by RNA polymerase II, regulation of multicellular organismal process, system development, regulation of signal transduction, detection of chemical stimulus involved in sensory perception of smell                                                                                 | growth hormone receptor binding, enzyme binding                                                                                                                                                                                              |
| hsa-miR-409 | MI0001735 | 14q32.31 | 14:101065300-101065378 | B | hsa-miR-409-5p | MIMAT0001638 | -                                                                                                                                                                                                                                                                                                                                                                                              | -                                                                                                                                                                                                                                            |
|             |           |          |                        |   | hsa-miR-409-3p | MIMAT0001639 | central nervous system neuron differentiation, forebrain development, vasculature development, negative regulation of transcription, DNA-templated, detection of chemical stimulus involved in sensory perception                                                                                                                                                                              | protein binding                                                                                                                                                                                                                              |
| hsa-miR-412 | MI0002464 | 14q32.31 | 14:101065447-101065537 | B | hsa-miR-412-5p | MIMAT0026557 | -                                                                                                                                                                                                                                                                                                                                                                                              | -                                                                                                                                                                                                                                            |
|             |           |          |                        |   | hsa-miR-412-3p | MIMAT0002170 | positive regulation of cellular component organization, positive regulation of cellular metabolic process                                                                                                                                                                                                                                                                                      | RNA polymerase II cis-regulatory region sequence-specific DNA binding, DNA-binding transcription factor activity, RNA polymerase II-specific                                                                                                 |
| hsa-miR-369 | MI0000777 | 14q32.31 | 14:101065598-101065667 | B | hsa-miR-369-5p | MIMAT0001621 | -                                                                                                                                                                                                                                                                                                                                                                                              | -                                                                                                                                                                                                                                            |
|             |           |          |                        |   | hsa-miR-369-3p | MIMAT0000721 | dentate gyrus development, sequestering of extracellular ligand from receptor, positive regulation of translational initiation, neuroblast proliferation, forebrain neuron development, ventricular septum morphogenesis, hippo signaling, positive regulation of BMP signaling pathway, cyclic nucleotide metabolic process, cyclic-nucleotide-mediated signaling, ureteric bud morphogenesis | DNA-binding transcription activator activity, RNA polymerase II-specific, DNA-binding transcription factor binding, protein domain specific binding, RNA polymerase II cis-regulatory region sequence-specific DNA binding, zinc ion binding |
| hsa-miR-410 | MI0002465 | 14q32.31 | 14:101065912-101065991 | B | hsa-miR-410-5p | MIMAT0026558 | peptidyl-amino acid modification                                                                                                                                                                                                                                                                                                                                                               | -                                                                                                                                                                                                                                            |
|             |           |          |                        |   | hsa-miR-410-3p | MIMAT0002171 | negative regulation of SMAD protein complex assembly, positive regulation of deacetylase activity, positive regulation of cardiac muscle cell proliferation, regulation of vasculogenesis, cell proliferation in forebrain, mRNA destabilization, canonical Wnt signaling pathway, response to fluid shear stress, regulation of cAMP-mediated signaling                                       | SMAD binding, PDZ domain binding, mRNA binding, DNA-binding transcription activator activity, RNA polymerase II-specific, chromatin binding, transcription factor binding, transferase activity                                              |
| hsa-miR-656 | MI0003678 | 14q32.31 | 14:101066724-101066801 | B | hsa-miR-656-5p | MIMAT0026627 | regulation of postsynapse organization, peripheral nervous system development, response to acid chemical, positive regulation of neuron projection development, central nervous system neuron differentiation, regulation of endothelial cell migration, developmental growth, regulation of epithelial cell proliferation, axon guidance                                                      | guanyl-nucleotide exchange factor activity, DNA-binding transcription activator activity, RNA polymerase II-specific, RNA polymerase II cis-regulatory region sequence-specific DNA binding, enzyme binding, metal ion binding               |
|             |           |          |                        |   | hsa-miR-656-3p | MIMAT0003332 | -                                                                                                                                                                                                                                                                                                                                                                                              | protein binding                                                                                                                                                                                                                              |
